# Supplementary material
Source: PubMed Central journal article supplement (PMC2287328)
Supplement: plntphys_pp.107.115220_1.pdf [file plntphys_pp.107.115220_1.pdf]

## SUPPLEMENTARY TABLES

**Supplementary Table 1.** Amino acid content (nmol/g FW) in leaves of Col wild type and mutants<sup>a</sup>

| Amino acid   | Col WT             | <i>5-fcl</i>      | <i>arc12</i> | <i>ats1-1</i> | <i>npq1-2</i> | <i>sex1-1</i>     | <i>sex4-5</i>     | <i>tha1-1</i> | <i>tt7-3</i> |
|--------------|--------------------|-------------------|--------------|---------------|---------------|-------------------|-------------------|---------------|--------------|
| Ala          | <b>814 ± 27</b>    | 1,089 ± 132       | 780 ± 47     | 736 ± 84      | 759 ± 74      | 1,413 ± 123***    | 1,031 ± 79        | 1,014 ± 213   | 999 ± 36     |
| Arg          | <b>18 ± 1</b>      | 15 ± 1            | 12 ± 1       | 12 ± 2        | 16 ± 2        | 47 ± 8***         | 11 ± 3            | 12 ± 1        | 22 ± 4       |
| Asn          | <b>48 ± 1</b>      | 64 ± 7            | 60 ± 5       | 47 ± 2        | 44 ± 3        | 328 ± 76***       | 85 ± 16           | 63 ± 6        | 40 ± 2       |
| Asp          | <b>903 ± 24</b>    | 1,420 ± 80***     | 1,057 ± 78   | 1,258 ± 87**  | 870 ± 90      | 2,562 ± 247***    | 1,589 ± 135***    | 1,401 ± 78*** | 681 ± 63     |
| Cys          | <b>2.8 ± 0.1</b>   | 4.0 ± 0.5         | 3.1 ± 0.5    | 3.0 ± 0.4     | 2.5 ± 0.2     | 8.0 ± 0.7***      | 6.1 ± 1.0***      | 4.0 ± 0.7     | 2.5 ± 0.4    |
| Gln          | <b>551 ± 18</b>    | 773 ± 77*         | 578 ± 38     | 493 ± 30      | 554 ± 54      | 1,176 ± 146***    | 717 ± 148         | 593 ± 28      | 520 ± 38     |
| Glu          | <b>2,759 ± 59</b>  | 3,339 ± 154       | 3,243 ± 170  | 3,527 ± 40**  | 2,614 ± 208   | 5,323 ± 420***    | 4,673 ± 486***    | 3,563 ± 133*  | 2,229 ± 172  |
| Gly          | <b>126 ± 4</b>     | 1,293 ± 479***    | 149 ± 13     | 148 ± 10      | 122 ± 14      | 412 ± 42          | 256 ± 50          | 166 ± 13      | 121 ± 10     |
| His          | <b>37 ± 2</b>      | 33 ± 7            | 39 ± 3       | 35 ± 3        | 35 ± 4        | 75 ± 15***        | 33 ± 4            | 40 ± 2        | 28 ± 2       |
| Ile          | <b>16 ± 1</b>      | 23 ± 4            | 17 ± 1       | 21 ± 2        | 15 ± 4        | 51 ± 19***        | 26 ± 4            | 18 ± 1        | 10 ± 2       |
| Leu          | <b>32 ± 4</b>      | 37 ± 11           | 25 ± 2       | 36 ± 7        | 31 ± 9        | 54 ± 20           | 30 ± 7            | 28 ± 2        | 27 ± 4       |
| Lys          | <b>42 ± 1</b>      | 49 ± 6            | 39 ± 3       | 50 ± 9        | 41 ± 6        | 80 ± 19***        | 47 ± 8            | 45 ± 3        | 37 ± 3       |
| Met          | <b>21 ± 1</b>      | 19 ± 2            | 21 ± 2       | 19 ± 2        | 22 ± 2        | 20 ± 2            | 20 ± 4            | 22 ± 2        | 20 ± 2       |
| Phe          | <b>62 ± 3</b>      | 83 ± 12           | 58 ± 5       | 65 ± 2        | 65 ± 7        | 128 ± 21***       | 90 ± 11           | 48 ± 3        | 71 ± 3       |
| Pro          | <b>168 ± 16</b>    | 201 ± 16          | 156 ± 10     | 164 ± 17      | 151 ± 10      | 294 ± 57          | 287 ± 125         | 164 ± 8       | 156 ± 12     |
| Ser          | <b>348 ± 15</b>    | 921 ± 120***      | 410 ± 42     | 380 ± 52      | 346 ± 77      | 1,213 ± 275***    | 1,009 ± 448***    | 527 ± 29      | 288 ± 20     |
| Thr          | <b>579 ± 19</b>    | 851 ± 70*         | 712 ± 59     | 621 ± 45      | 512 ± 55      | 1,377 ± 162***    | 1,373 ± 221***    | 815 ± 121     | 520 ± 52     |
| Trp          | <b>7.4 ± 0.7</b>   | 11 ± 3            | 6.5 ± 0.4    | 10 ± 1        | 7.5 ± 2.3     | 24 ± 8***         | 12 ± 2            | 8.4 ± 0.9     | 4.9 ± 0.9    |
| Tyr          | <b>12 ± 0.5</b>    | 17 ± 4            | 12 ± 1       | 15 ± 2        | 12 ± 2        | 22 ± 5***         | 15 ± 3            | 14 ± 1        | 11 ± 1       |
| Val          | <b>89 ± 5</b>      | 112 ± 18          | 90 ± 6       | 87 ± 9        | 87 ± 11       | 184 ± 52***       | 120 ± 17          | 96 ± 8        | 97 ± 7       |
| <i>Total</i> | <b>6,653 ± 126</b> | 10,354 ± 1,039*** | 7,466 ± 416  | 7,727 ± 175   | 6,306 ± 467   | 14,793 ± 1,105*** | 11,430 ± 1,515*** | 8,643 ± 369*  | 5,886 ± 344  |

<sup>a</sup>Data are presented as mean ± SE ( $n = 3 - 6$  for mutants,  $n = 71$  for Col WT).

\*The asterisk indicates a significant difference of amino acid content between the mutant and Col wild type (Dunnett's test, \*,  $p < 0.05$ ; \*\*,  $p < 0.01$ ; \*\*\*,  $p < 0.001$ ).

**Supplementary Table 2.** Amino acid content (nmol/g FW) in leaves of Ws wild type and mutants<sup>a</sup>

| Amino acid   | Ws WT              | <i>arc10</i> | <i>dpe2-1</i> | <i>fatb-ko</i> | <i>lkr-sdh</i> | <i>pig1-1</i> |
|--------------|--------------------|--------------|---------------|----------------|----------------|---------------|
| Ala          | <b>719 ± 26</b>    | 785 ± 85     | 876 ± 45      | 823 ± 69       | 834 ± 54       | 728 ± 111     |
| Arg          | <b>36 ± 2</b>      | 20 ± 3       | 21 ± 4        | 15 ± 2**       | 32 ± 12        | 27 ± 4        |
| Asn          | <b>43 ± 2</b>      | 44 ± 6       | 73 ± 5***     | 80 ± 8***      | 58 ± 10        | 47 ± 4        |
| Asp          | <b>526 ± 18</b>    | 631 ± 117    | 501 ± 62      | 1,714 ± 178*** | 621 ± 103      | 719 ± 41      |
| Cys          | <b>1.5 ± 0.1</b>   | 2.0 ± 0.6    | 2.4 ± 0.4     | 4.5 ± 0.4***   | 2.1 ± 0.7      | 2.2 ± 0.3     |
| Gln          | <b>392 ± 20</b>    | 401 ± 42     | 674 ± 38***   | 987 ± 107***   | 488 ± 130      | 461 ± 60      |
| Glu          | <b>1,575 ± 60</b>  | 1,994 ± 360  | 1,741 ± 90    | 3,985 ± 198*** | 1,856 ± 305    | 2,127 ± 109*  |
| Gly          | <b>94 ± 7</b>      | 105 ± 22     | 356 ± 42***   | 203 ± 15***    | 127 ± 39       | 115 ± 19      |
| His          | <b>23 ± 1</b>      | 19 ± 1       | 32 ± 2        | 45 ± 5***      | 26 ± 3         | 42 ± 11**     |
| Ile          | <b>7.0 ± 1.0</b>   | 7.7 ± 2.5    | 8.2 ± 2.3     | 20 ± 2***      | 8.4 ± 3.1      | 13 ± 5        |
| Leu          | <b>23 ± 2</b>      | 21 ± 2       | 21 ± 2        | 30 ± 4         | 17 ± 1         | 51 ± 30       |
| Lys          | <b>35 ± 1</b>      | 32 ± 1       | 30 ± 2        | 51 ± 7*        | 33 ± 1         | 49 ± 12*      |
| Met          | <b>19 ± 1</b>      | 18 ± 1       | 18 ± 1        | 27 ± 3***      | 19 ± 3         | 19 ± 2        |
| Phe          | <b>52 ± 2</b>      | 55 ± 6       | 108 ± 8***    | 74 ± 6*        | 54 ± 6         | 79 ± 19**     |
| Pro          | <b>132 ± 11</b>    | 124 ± 20     | 135 ± 9       | 212 ± 18*      | 174 ± 18       | 175 ± 17      |
| Ser          | <b>278 ± 15</b>    | 335 ± 77     | 295 ± 29      | 705 ± 48***    | 374 ± 90       | 243 ± 42      |
| Thr          | <b>290 ± 17</b>    | 415 ± 101    | 442 ± 47      | 755 ± 95***    | 438 ± 132      | 464 ± 55*     |
| Trp          | <b>3.3 ± 0.3</b>   | 4.4 ± 1.0    | 9.3 ± 1.3**   | 8.4 ± 0.6*     | 4.5 ± 1.5      | 9.3 ± 4.7**   |
| Tyr          | <b>11 ± 0.5</b>    | 10 ± 1       | 14 ± 1        | 14 ± 2         | 10 ± 1         | 16 ± 6        |
| Val          | <b>94 ± 4</b>      | 89 ± 5       | 108 ± 5       | 97 ± 9         | 101 ± 9        | 113 ± 37      |
| <i>Total</i> | <b>4,355 ± 135</b> | 5,114 ± 812  | 5,464 ± 264   | 9,849 ± 482*** | 5,278 ± 786    | 5,498 ± 430   |

<sup>a</sup>Data are presented as mean ± SE ( $n = 3 - 6$  for mutants,  $n = 42$  for Ws WT).

\*The asterisk indicates a significant difference of amino acid content(s) between the mutant and Ws wild type (Dunnett's test, \*,  $p < 0.05$ ; \*\*,  $p < 0.01$ ; \*\*\*,  $p < 0.001$ ).

**Supplementary Table 3. Amino acid content (nmol/g FW) in seeds of Col wild type and mutants<sup>a</sup>**

| Amino acid   | Col WT             | <i>5-fcl</i>             | <i>arc12</i>       | <i>ats1-1</i>        | <i>npq1-2</i>         | <i>sex1-1</i>          | <i>sex4-5</i>      | <i>tha1-1</i>          | <i>tt7-3</i>           |
|--------------|--------------------|--------------------------|--------------------|----------------------|-----------------------|------------------------|--------------------|------------------------|------------------------|
| Ala          | <b>395 ± 12</b>    | 752 ± 243***             | 443 ± 42           | 396 ± 47             | 468 ± 59              | 697 ± 92***            | 524 ± 40           | 599 ± 52*              | 1,043 ± 30***          |
| Arg          | <b>137 ± 17</b>    | 1,208 ± 300***           | 135 ± 12           | 143 ± 32             | 212 ± 72              | 227 ± 32               | 130 ± 8            | 286 ± 40               | 349 ± 62*              |
| Asn          | <b>478 ± 17</b>    | 549 ± 75                 | 543 ± 44           | 509 ± 47             | 517 ± 56              | 647 ± 73               | 450 ± 50           | 652 ± 80               | 869 ± 96***            |
| Asp          | <b>752 ± 25</b>    | 222 ± 39***              | 731 ± 83           | 666 ± 91             | 748 ± 78              | 1,065 ± 205*           | 733 ± 69           | 640 ± 64               | 802 ± 87               |
| Cys          | <b>3.6 ± 0.1</b>   | 13 ± 4***                | 3.5 ± 0.5          | 3.9 ± 0.8            | 4.1 ± 0.8             | 5.8 ± 0.8              | 4.7 ± 0.6          | 40 ± 2***              | 4.2 ± 0.6              |
| Gln          | <b>252 ± 16</b>    | 887 ± 122***             | 250 ± 46           | 337 ± 112            | 408 ± 157             | 366 ± 59               | 286 ± 36           | 545 ± 97**             | 398 ± 71               |
| Glu          | <b>2,715 ± 69</b>  | 1,811 ± 151              | 2,883 ± 213        | 2,741 ± 140          | 2,715 ± 69            | 3,636 ± 479**          | 3,083 ± 261        | 2,527 ± 311            | 2,872 ± 140            |
| Gly          | <b>369 ± 14</b>    | 18,483 ± 4,596***        | 380 ± 55           | 330 ± 62             | 446 ± 120             | 570 ± 62               | 383 ± 38           | 477 ± 50               | 654 ± 106              |
| His          | <b>143 ± 10</b>    | 335 ± 93**               | 163 ± 30           | 172 ± 69             | 198 ± 64              | 269 ± 40*              | 151 ± 16           | 271 ± 28*              | 210 ± 30               |
| Ile          | <b>175 ± 9</b>     | 250 ± 65                 | 178 ± 25           | 193 ± 52             | 259 ± 95              | 282 ± 32               | 207 ± 25           | 240 ± 41               | 402 ± 57***            |
| Leu          | <b>223 ± 12</b>    | 290 ± 76                 | 243 ± 39           | 242 ± 69             | 223 ± 12              | 366 ± 153              | 385 ± 45           | 275 ± 28               | 450 ± 55***            |
| Lys          | <b>120 ± 7</b>     | 536 ± 171***             | 133 ± 20           | 130 ± 34             | 185 ± 51              | 229 ± 29*              | 144 ± 16           | 192 ± 12               | 206 ± 24               |
| Met          | <b>43 ± 1</b>      | 61 ± 15*                 | 55 ± 4             | 47 ± 3               | 46 ± 5                | 68 ± 7***              | 58 ± 5*            | 52 ± 7                 | 71 ± 4***              |
| Phe          | <b>223 ± 10</b>    | 321 ± 67                 | 235 ± 27           | 238 ± 54             | 321 ± 102             | 353 ± 42*              | 261 ± 21           | 304 ± 30               | 329 ± 42               |
| Pro          | <b>1,117 ± 94</b>  | 836 ± 224                | 930 ± 324          | 1,057 ± 563          | 1,777 ± 842           | 2,079 ± 411            | 1,346 ± 438        | 1,384 ± 499            | 1,844 ± 438            |
| Ser          | <b>373 ± 12</b>    | 15,241 ± 2,809***        | 438 ± 36           | 361 ± 57             | 373 ± 12              | 650 ± 67               | 503 ± 46           | 458 ± 33               | 684 ± 50               |
| Thr          | <b>324 ± 13</b>    | 1,101 ± 269***           | 377 ± 60           | 335 ± 101            | 442 ± 125             | 549 ± 66               | 387 ± 41           | 8,838 ± 612***         | 540 ± 94               |
| Trp          | <b>218 ± 9</b>     | 146 ± 31                 | 248 ± 34           | 207 ± 43             | 257 ± 37              | 369 ± 47***            | 343 ± 32**         | 216 ± 11               | 390 ± 24***            |
| Tyr          | <b>62 ± 2</b>      | 86 ± 18                  | 72 ± 7             | 67 ± 10              | 62 ± 2                | 103 ± 12***            | 76 ± 8             | 84 ± 6                 | 101 ± 6***             |
| Val          | <b>280 ± 14</b>    | 480 ± 96                 | 278 ± 32           | 305 ± 68             | 441 ± 169             | 525 ± 52**             | 318 ± 36           | 355 ± 69               | 657 ± 69***            |
| <b>Total</b> | <b>8,401 ± 294</b> | <b>43,608 ± 9,330***</b> | <b>8,719 ± 904</b> | <b>8,480 ± 1,581</b> | <b>10,240 ± 2,209</b> | <b>13,074 ± 1,451*</b> | <b>9,662 ± 780</b> | <b>18,479 ± 992***</b> | <b>12,875 ± 1,357*</b> |

<sup>a</sup>Data are presented as mean ± SE ( $n = 3 - 6$  for mutants,  $n = 67$  for Col WT).

\*The asterisk indicates a significant difference of amino acid content between the mutant and Col wild type (Dunnett's test, \*,  $p < 0.05$ ; \*\*,  $p < 0.01$ ; \*\*\*,  $p < 0.001$ ).

**Supplementary Table 4.** Amino acid contents (nmol/g FW) in seeds of Ws wild type and mutants<sup>a</sup>

| Amino acid   | Ws WT              | <i>arc10</i>       | <i>dpe2-1</i>      | <i>fatb-ko</i>           | <i>lkr-sdh</i>       | <i>pig1-1</i>            |
|--------------|--------------------|--------------------|--------------------|--------------------------|----------------------|--------------------------|
| Ala          | <b>393 ± 20</b>    | 297 ± 35           | 385 ± 39           | 746 ± 36***              | 561 ± 74             | 430 ± 63                 |
| Arg          | <b>111 ± 7</b>     | 94 ± 21            | 93 ± 15            | 322 ± 42***              | 149 ± 18             | 145 ± 22                 |
| Asn          | <b>297 ± 13</b>    | 231 ± 30           | 194 ± 16           | 830 ± 26***              | 411 ± 42             | 642 ± 61***              |
| Asp          | <b>634 ± 34</b>    | 456 ± 79           | 444 ± 65           | 955 ± 121**              | 614 ± 84             | 792 ± 54                 |
| Cys          | <b>3.5 ± 0.2</b>   | 3.2 ± 0.6          | 2.4 ± 0.04         | 7.2 ± 0.7***             | 4.1 ± 0.8            | 5.5 ± 0.6*               |
| Gln          | <b>204 ± 17</b>    | 160 ± 42           | 267 ± 62           | 363 ± 40                 | 227 ± 53             | 1,286 ± 298***           |
| Glu          | <b>2,425 ± 106</b> | 1,898 ± 273        | 1,728 ± 139        | 4,380 ± 179***           | 2,289 ± 278          | 2,749 ± 264              |
| Gly          | <b>282 ± 18</b>    | 214 ± 23           | 211 ± 35           | 605 ± 34***              | 399 ± 93             | 538 ± 120***             |
| His          | <b>85 ± 5</b>      | 68 ± 14            | 72 ± 9             | 261 ± 45***              | 120 ± 17             | 369 ± 77***              |
| Ile          | <b>168 ± 9</b>     | 142 ± 19           | 128 ± 9            | 338 ± 44**               | 227 ± 44             | 746 ± 138***             |
| Leu          | <b>198 ± 12</b>    | 162 ± 24           | 185 ± 18           | 424 ± 65***              | 293 ± 61             | 591 ± 101***             |
| Lys          | <b>102 ± 7</b>     | 78 ± 15            | 93 ± 11            | 258 ± 40***              | 292 ± 42***          | 167 ± 28                 |
| Met          | <b>41 ± 2</b>      | 36 ± 6             | 32 ± 4             | 98 ± 8***                | 47 ± 2               | 46 ± 7                   |
| Phe          | <b>198 ± 10</b>    | 159 ± 25           | 169 ± 18           | 469 ± 42***              | 243 ± 30             | 290 ± 37*                |
| Pro          | <b>426 ± 87</b>    | 262 ± 74           | 223 ± 2            | 1,667 ± 549***           | 647 ± 211            | 980 ± 208                |
| Ser          | <b>344 ± 15</b>    | 264 ± 27           | 265 ± 29           | 805 ± 32***              | 460 ± 73             | 432 ± 46                 |
| Thr          | <b>230 ± 12</b>    | 167 ± 20           | 207 ± 20           | 496 ± 67***              | 315 ± 49             | 665 ± 133***             |
| Trp          | <b>428 ± 24</b>    | 488 ± 79           | 438 ± 65           | 796 ± 126***             | 517 ± 61             | 169 ± 27*                |
| Tyr          | <b>66 ± 3</b>      | 54 ± 8             | 58 ± 6             | 115 ± 12***              | 74 ± 10              | 124 ± 20***              |
| Val          | <b>238 ± 11</b>    | 185 ± 22           | 193 ± 6            | 448 ± 42***              | 296 ± 59             | 827 ± 161***             |
| <b>Total</b> | <b>6,875 ± 323</b> | <b>5,421 ± 756</b> | <b>5,387 ± 370</b> | <b>14,384 ± 1,306***</b> | <b>8,184 ± 1,248</b> | <b>11,994 ± 1,688***</b> |

<sup>a</sup>Data are presented as mean ± SE ( $n = 3 - 6$  for mutants,  $n = 33$  for Ws WT).

\*The asterisk indicates a significant difference of amino acid content(s) between the mutant and Ws wild type (Dunnett's test, \*,  $p < 0.05$ ; \*\*,  $p < 0.01$ ; \*\*\*,  $p < 0.001$ ).

**Supplementary Table 5. Fatty acids (nmol/g FW) in wild type and mutant leaves<sup>a</sup>**

| Genotype       | 16:0               | <i>cis</i> -16:1     | <i>trans</i> -16:1d3 | 16:2                 | 16:3               | 18:0                 | 18:1d9             | 18:1d11              | 18:2               | 18:2 DCA             | 18:3             |
|----------------|--------------------|----------------------|----------------------|----------------------|--------------------|----------------------|--------------------|----------------------|--------------------|----------------------|------------------|
| <b>Col WT</b>  | <b>2.30 ± 0.03</b> | <b>0.098 ± 0.002</b> | <b>0.64 ± 0.01</b>   | <b>0.158 ± 0.003</b> | <b>2.38 ± 0.03</b> | <b>0.173 ± 0.003</b> | <b>0.66 ± 0.01</b> | <b>0.046 ± 0.001</b> | <b>2.45 ± 0.03</b> | <b>0.187 ± 0.002</b> | <b>8.8 ± 0.1</b> |
| <i>5-fcl</i>   | 2.35 ± 0.06        | 0.135 ± 0.043*       | 0.68 ± 0.02          | 0.152 ± 0.005        | 2.44 ± 0.04        | 0.175 ± 0.008        | 0.61 ± 0.03        | 0.064 ± 0.009***     | 2.47 ± 0.05        | 0.212 ± 0.006*       | 9.1 ± 0.2        |
| <i>arc12</i>   | 2.05 ± 0.08        | 0.081 ± 0.005        | 0.63 ± 0.02          | 0.131 ± 0.011*       | 2.14 ± 0.09        | 0.153 ± 0.013        | 0.60 ± 0.05        | 0.037 ± 0.002        | 2.31 ± 0.12        | 0.169 ± 0.011        | 8.0 ± 0.3        |
| <i>ats1-1</i>  | 1.82 ± 0.05***     | 0.026 ± 0.001***     | 0.54 ± 0.02*         | 0.030 ± 0.002***     | 0.10 ± 0.01***     | 0.188 ± 0.009        | 1.09 ± 0.03***     | 0.066 ± 0.007***     | 3.00 ± 0.07***     | 0.212 ± 0.005*       | 9.0 ± 0.1        |
| <i>npq1-2</i>  | 2.23 ± 0.05        | 0.091 ± 0.004        | 0.67 ± 0.02          | 0.162 ± 0.006        | 2.42 ± 0.04        | 0.167 ± 0.004        | 0.63 ± 0.01        | 0.043 ± 0.002        | 2.43 ± 0.07        | 0.185 ± 0.008        | 8.8 ± 0.2        |
| <i>sex1-1</i>  | 2.21 ± 0.20        | 0.095 ± 0.010        | 0.64 ± 0.04          | 0.149 ± 0.019        | 2.32 ± 0.14        | 0.196 ± 0.029        | 0.69 ± 0.07        | 0.055 ± 0.004        | 2.81 ± 0.25*       | 0.169 ± 0.014        | 7.8 ± 0.7        |
| <i>sex4-5</i>  | 2.23 ± 0.12        | 0.086 ± 0.003        | 0.66 ± 0.03          | 0.139 ± 0.009        | 2.26 ± 0.09        | 0.165 ± 0.011        | 0.62 ± 0.04        | 0.043 ± 0.004        | 2.45 ± 0.15        | 0.192 ± 0.008        | 8.1 ± 0.4        |
| <i>tha1-1</i>  | 2.50 ± 0.07        | 0.096 ± 0.003        | 0.57 ± 0.03          | 0.148 ± 0.006        | 2.21 ± 0.03        | 0.228 ± 0.015***     | 0.68 ± 0.03        | 0.036 ± 0.001        | 2.73 ± 0.06        | 0.215 ± 0.006*       | 9.2 ± 0.2        |
| <i>tt7-3</i>   | 2.39 ± 0.02        | 0.125 ± 0.016        | 0.73 ± 0.03*         | 0.179 ± 0.006        | 2.41 ± 0.04        | 0.156 ± 0.004        | 0.71 ± 0.01        | 0.045 ± 0.001        | 2.68 ± 0.05        | 0.206 ± 0.011        | 8.9 ± 0.1        |
| <b>Ws WT</b>   | <b>1.86 ± 0.04</b> | <b>0.077 ± 0.003</b> | <b>0.53 ± 0.01</b>   | <b>0.098 ± 0.004</b> | <b>2.18 ± 0.04</b> | <b>0.144 ± 0.005</b> | <b>0.45 ± 0.02</b> | <b>0.044 ± 0.001</b> | <b>2.07 ± 0.05</b> | <b>0.116 ± 0.007</b> | <b>7.3 ± 0.1</b> |
| <i>arc10</i>   | 1.77 ± 0.10        | 0.069 ± 0.006        | 0.50 ± 0.06          | 0.083 ± 0.008        | 2.06 ± 0.11        | 0.133 ± 0.013        | 0.41 ± 0.04        | 0.043 ± 0.001        | 1.91 ± 0.13        | 0.108 ± 0.019        | 7.0 ± 0.3        |
| <i>dpe2-1</i>  | 2.10 ± 0.03        | 0.092 ± 0.004        | 0.75 ± 0.03***       | 0.130 ± 0.008*       | 2.20 ± 0.06        | 0.181 ± 0.004*       | 0.64 ± 0.02**      | 0.043 ± 0.001        | 2.49 ± 0.06        | 0.171 ± 0.014*       | 8.0 ± 0.2        |
| <i>fatb-ko</i> | 1.55 ± 0.11*       | 0.192 ± 0.008***     | 0.60 ± 0.04          | 0.168 ± 0.014***     | 2.55 ± 0.14*       | 0.087 ± 0.008***     | 1.38 ± 0.09***     | 0.113 ± 0.008***     | 3.68 ± 0.29***     | 0.180 ± 0.010**      | 8.0 ± 0.6        |
| <i>lkr-sdh</i> | 1.86 ± 0.09        | 0.072 ± 0.010        | 0.64 ± 0.10          | 0.089 ± 0.012        | 2.29 ± 0.08        | 0.146 ± 0.007        | 0.44 ± 0.03        | 0.0452 ± 0.0005      | 2.00 ± 0.14        | 0.107 ± 0.019        | 7.3 ± 0.3        |
| <i>pig1-1</i>  | 2.19 ± 0.10*       | 0.092 ± 0.007        | 0.60 ± 0.03          | 0.114 ± 0.009        | 2.36 ± 0.06        | 0.151 ± 0.010        | 0.61 ± 0.04*       | 0.054 ± 0.001**      | 2.27 ± 0.11        | 0.182 ± 0.010**      | 8.2 ± 0.3        |

<sup>a</sup>Data are presented as mean ± SE ( $n = 3 - 6$  for mutants,  $n = 71$  for Col WT,  $n = 42$  for Ws WT).

\*The asterisk indicates a significant difference of fatty acid content between the mutant and corresponding wild type (Col or Ws) (Dunnett's test, \*,  $p < 0.05$ ; \*\*,  $p < 0.01$ ; \*\*\*,  $p < 0.001$ ).

**Supplementary Table 6.** Spearman's correlation of traits in wild-type plants with  $|\rho| > 0.5^a$

| Variable                                 | by Variable                              | $\rho$  | Prob $>  \rho $       |
|------------------------------------------|------------------------------------------|---------|-----------------------|
| 14:0                                     | Leaf Arg                                 | 0.5226  | < 0.0001 <sup>b</sup> |
| 14:0                                     | Leaf Hyp                                 | -0.5237 | < 0.0001              |
| 16:2                                     | 14:0                                     | -0.6752 | < 0.0001              |
| 16:2                                     | Leaf Ala                                 | -0.5303 | < 0.0001 <sup>b</sup> |
| 16:2                                     | Leaf Arg                                 | -0.6583 | < 0.0001 <sup>b</sup> |
| 16:2                                     | Leaf Asn                                 | -0.5564 | < 0.0001 <sup>b</sup> |
| 16:2                                     | Leaf Glu                                 | 0.5930  | < 0.0001 <sup>b</sup> |
| 16:2                                     | Leaf Hyp                                 | 0.5790  | < 0.0001 <sup>b</sup> |
| 16:2                                     | Leaf Lys                                 | -0.6272 | < 0.0001              |
| 16:2                                     | Leaf Tyr                                 | -0.5339 | < 0.0001 <sup>b</sup> |
| 16:2                                     | Leaf Val                                 | -0.5928 | < 0.0001 <sup>b</sup> |
| 16:3                                     | 14:0                                     | 0.5737  | < 0.0001 <sup>b</sup> |
| 16:3                                     | 16:0                                     | -0.7299 | < 0.0001              |
| 16:3                                     | 16:2                                     | -0.6564 | < 0.0001 <sup>b</sup> |
| 16:3                                     | Leaf Arg                                 | 0.5326  | < 0.0001 <sup>b</sup> |
| 16:3                                     | Leaf Asn                                 | 0.5587  | < 0.0001 <sup>b</sup> |
| 16:3                                     | Leaf Hyp                                 | -0.5672 | < 0.0001 <sup>b</sup> |
| 16:3                                     | Leaf Thr                                 | -0.5570 | < 0.0001 <sup>b</sup> |
| 16:3                                     | Leaf Val                                 | 0.5738  | < 0.0001 <sup>b</sup> |
| 18:0                                     | 16:0                                     | 0.5230  | < 0.0001              |
| 18:2                                     | 18:0                                     | 0.5641  | < 0.0001              |
| 18:3                                     | 18:0                                     | -0.6706 | < 0.0001              |
| 18:3                                     | 18:2                                     | -0.5313 | < 0.0001              |
| (16:3+ <i>trans</i> -16:1d3)/(18:0+18:2) | 16:0                                     | -0.7100 | < 0.0001              |
| (16:3+ <i>trans</i> -16:1d3)/(18:0+18:2) | 16:2                                     | -0.5100 | < 0.0001              |
| (16:3+ <i>trans</i> -16:1d3)/(18:0+18:2) | 16:3                                     | 0.8496  | < 0.0001 <sup>c</sup> |
| (16:3+ <i>trans</i> -16:1d3)/(18:0+18:2) | 18:0                                     | -0.5737 | < 0.0001 <sup>c</sup> |
| (16:3+ <i>trans</i> -16:1d3)/(18:0+18:2) | 18:2                                     | -0.6948 | < 0.0001 <sup>c</sup> |
| (16:3+ <i>trans</i> -16:1d3)/(18:0+18:2) | 18:1d9                                   | -0.7383 | < 0.0001              |
| 16:0/(18:1d9+18:1d11)                    | 14:0                                     | 0.5616  | < 0.0001 <sup>b</sup> |
| 16:0/(18:1d9+18:1d11)                    | 16:2                                     | -0.7915 | < 0.0001              |
| 16:0/(18:1d9+18:1d11)                    | 16:3                                     | 0.7108  | < 0.0001              |
| 16:0/(18:1d9+18:1d11)                    | (16:3+ <i>trans</i> -16:1d3)/(18:0+18:2) | 0.6018  | < 0.0001              |
| 16:0/(18:1d9+18:1d11)                    | 16:3/18:2                                | 0.6295  | < 0.0001              |
| 16:0/(18:1d9+18:1d11)                    | 18:1d11                                  | 0.5550  | < 0.0001              |
| 16:0/(18:1d9+18:1d11)                    | 18:1d9                                   | -0.8959 | < 0.0001 <sup>c</sup> |
| 16:0/(18:1d9+18:1d11)                    | 18:2 DCA                                 | -0.5717 | < 0.0001 <sup>b</sup> |
| 16:0/(18:1d9+18:1d11)                    | <i>cis</i> -16:1                         | -0.6163 | < 0.0001              |
| 16:0/(18:1d9+18:1d11)                    | Leaf Arg                                 | 0.5902  | < 0.0001 <sup>b</sup> |
| 16:0/(18:1d9+18:1d11)                    | Leaf Asn                                 | 0.5670  | < 0.0001 <sup>b</sup> |
| 16:0/(18:1d9+18:1d11)                    | Leaf Glu                                 | -0.5468 | < 0.0001 <sup>b</sup> |
| 16:0/(18:1d9+18:1d11)                    | Leaf Hyp                                 | -0.5744 | < 0.0001 <sup>b</sup> |
| 16:0/(18:1d9+18:1d11)                    | Leaf Lys                                 | 0.5376  | < 0.0001 <sup>b</sup> |
| 16:0/(18:1d9+18:1d11)                    | Leaf Ser                                 | 0.5028  | < 0.0001 <sup>b</sup> |
| 16:0/(18:1d9+18:1d11)                    | Leaf Tyr                                 | 0.5194  | < 0.0001 <sup>b</sup> |
| 16:0/(18:1d9+18:1d11)                    | Leaf Val                                 | 0.5958  | < 0.0001 <sup>b</sup> |
| 16:3/18:2                                | 14:0                                     | 0.5470  | < 0.0001              |

|                            |                                          |         |                       |
|----------------------------|------------------------------------------|---------|-----------------------|
| 16:3/18:2                  | 16:0                                     | -0.6839 | < 0.0001              |
| 16:3/18:2                  | 16:2                                     | -0.5861 | < 0.0001              |
| 16:3/18:2                  | 16:3                                     | 0.9218  | < 0.0001 <sup>c</sup> |
| 16:3/18:2                  | 18:2                                     | -0.6823 | < 0.0001 <sup>c</sup> |
| 16:3/18:2                  | (16:3+ <i>trans</i> -16:1d3)/(18:0+18:2) | 0.9380  | < 0.0001 <sup>c</sup> |
| 16:3/18:2                  | 18:1d9                                   | -0.7638 | < 0.0001              |
| 18:1d11                    | 14:0                                     | 0.5597  | < 0.0001              |
| 18:1d11                    | 16:2                                     | -0.7270 | < 0.0001              |
| 18:1d9                     | 14:0                                     | -0.5168 | < 0.0001 <sup>b</sup> |
| 18:1d9                     | 16:0                                     | 0.6967  | < 0.0001              |
| 18:1d9                     | 16:2                                     | 0.7174  | < 0.0001 <sup>b</sup> |
| 18:1d9                     | 16:3                                     | -0.8541 | < 0.0001              |
| 18:1d9                     | <i>cis</i> -16:1                         | 0.5258  | < 0.0001              |
| 18:1d9                     | Leaf Arg                                 | -0.5570 | < 0.0001 <sup>b</sup> |
| 18:1d9                     | Leaf Asn                                 | -0.6544 | < 0.0001              |
| 18:1d9                     | Leaf Glu                                 | 0.5009  | < 0.0001 <sup>b</sup> |
| 18:1d9                     | Leaf Hyp                                 | 0.5452  | < 0.0001 <sup>b</sup> |
| 18:1d9                     | Leaf Lys                                 | -0.5294 | < 0.0001 <sup>b</sup> |
| 18:1d9                     | Leaf Thr                                 | 0.5218  | < 0.0001 <sup>b</sup> |
| 18:1d9                     | Leaf Val                                 | -0.5455 | < 0.0001 <sup>b</sup> |
| 18:2 DCA                   | 16:2                                     | 0.5992  | < 0.0001 <sup>b</sup> |
| 18:2 DCA                   | Leaf Ala                                 | -0.6462 | < 0.0001              |
| 18:2 DCA                   | Leaf Arg                                 | -0.6280 | < 0.0001 <sup>b</sup> |
| 18:2 DCA                   | Leaf Asn                                 | -0.5023 | < 0.0001 <sup>b</sup> |
| 18:2 DCA                   | Leaf Hyp                                 | 0.6388  | < 0.0001 <sup>b</sup> |
| 18:2 DCA                   | Leaf Lys                                 | -0.5696 | < 0.0001 <sup>b</sup> |
| 18:2 DCA                   | Leaf Met                                 | -0.5527 | < 0.0001 <sup>b</sup> |
| 18:2 DCA                   | Leaf Phe                                 | -0.5417 | < 0.0001 <sup>b</sup> |
| 18:2 DCA                   | Leaf Thr                                 | 0.5386  | < 0.0001 <sup>b</sup> |
| 18:2 DCA                   | Leaf Tyr                                 | -0.5679 | < 0.0001 <sup>b</sup> |
| 18:2 DCA                   | Leaf Val                                 | -0.6445 | < 0.0001 <sup>b</sup> |
| Inflorescence <sup>d</sup> | 14:0                                     | 0.5551  | < 0.0001 <sup>b</sup> |
| Inflorescence <sup>d</sup> | 16:2                                     | -0.716  | < 0.0001 <sup>b</sup> |
| Inflorescence <sup>d</sup> | 16:3                                     | 0.6910  | < 0.0001 <sup>b</sup> |
| Inflorescence <sup>d</sup> | 16:0/(18:1d9+18:1d11)                    | 0.7102  | < 0.0001 <sup>b</sup> |
| Inflorescence <sup>d</sup> | 16:3/18:2                                | 0.5160  | < 0.0001 <sup>b</sup> |
| Inflorescence <sup>d</sup> | 18:1d9                                   | -0.7085 | < 0.0001 <sup>b</sup> |
| Inflorescence <sup>d</sup> | 18:2 DCA                                 | -0.7585 | < 0.0001 <sup>b</sup> |
| Inflorescence <sup>d</sup> | Leaf Ala                                 | 0.6477  | < 0.0001 <sup>b</sup> |
| Inflorescence <sup>d</sup> | Leaf Arg                                 | 0.7227  | < 0.0001 <sup>b</sup> |
| Inflorescence <sup>d</sup> | Leaf Asn                                 | 0.6802  | < 0.0001 <sup>b</sup> |
| Inflorescence <sup>d</sup> | Leaf color <sup>d</sup>                  | -0.9424 | < 0.0001 <sup>b</sup> |
| Inflorescence <sup>d</sup> | Leaf Cys                                 | -0.5189 | < 0.0001 <sup>b</sup> |
| Inflorescence <sup>d</sup> | Leaf Glu                                 | -0.6210 | < 0.0001 <sup>b</sup> |
| Inflorescence <sup>d</sup> | Leaf Hyp                                 | -0.7294 | < 0.0001 <sup>b</sup> |
| Inflorescence <sup>d</sup> | Leaf Lys                                 | 0.6648  | < 0.0001 <sup>b</sup> |
| Inflorescence <sup>d</sup> | Leaf Met                                 | 0.6126  | < 0.0001 <sup>b</sup> |
| Inflorescence <sup>d</sup> | Leaf Phe                                 | 0.5289  | < 0.0001 <sup>b</sup> |
| Inflorescence <sup>d</sup> | Leaf Thr                                 | -0.6306 | < 0.0001 <sup>b</sup> |
| Inflorescence <sup>d</sup> | Leaf Tyr                                 | 0.6535  | < 0.0001 <sup>b</sup> |

|                            |                       |         |                       |
|----------------------------|-----------------------|---------|-----------------------|
| Inflorescence <sup>d</sup> | Leaf Val              | 0.7419  | < 0.0001 <sup>b</sup> |
| Inflorescence <sup>d</sup> | Seed %C               | 0.5826  | < 0.0001 <sup>b</sup> |
| Inflorescence <sup>d</sup> | Seed Ala              | 0.6151  | < 0.0001 <sup>b</sup> |
| Inflorescence <sup>d</sup> | Seed Asn              | -0.6447 | < 0.0001 <sup>b</sup> |
| Inflorescence <sup>d</sup> | Seed C/N ratio        | 0.6239  | < 0.0001 <sup>b</sup> |
| Inflorescence <sup>d</sup> | Seed His              | -0.6443 | < 0.0001 <sup>b</sup> |
| Inflorescence <sup>d</sup> | Seed Ile              | 0.5985  | < 0.0001 <sup>b</sup> |
| Inflorescence <sup>d</sup> | Seed Pro              | -0.5851 | < 0.0001 <sup>b</sup> |
| Inflorescence <sup>d</sup> | Seed Ser              | 0.5731  | < 0.0001 <sup>b</sup> |
| Inflorescence <sup>d</sup> | Seed Trp              | 0.7393  | < 0.0001 <sup>b</sup> |
| Inflorescence <sup>d</sup> | Seed Tyr              | 0.7393  | < 0.0001 <sup>b</sup> |
| Leaf Arg                   | Leaf Ala              | 0.7671  | < 0.0001              |
| Leaf Asp                   | Leaf Ala              | -0.6763 | < 0.0001              |
| Leaf Asp                   | Leaf Arg              | -0.5806 | < 0.0001              |
| Leaf color <sup>d</sup>    | 14:0                  | -0.5609 | < 0.0001 <sup>b</sup> |
| Leaf color <sup>d</sup>    | 16:0                  | 0.5107  | < 0.0001 <sup>b</sup> |
| Leaf color <sup>d</sup>    | 16:2                  | 0.7375  | < 0.0001 <sup>b</sup> |
| Leaf color <sup>d</sup>    | 16:3                  | -0.7023 | < 0.0001 <sup>b</sup> |
| Leaf color <sup>d</sup>    | 16:0/(18:1d9+18:1d11) | -0.7311 | < 0.0001 <sup>b</sup> |
| Leaf color <sup>d</sup>    | 18:1d9                | 0.7284  | < 0.0001 <sup>b</sup> |
| Leaf color <sup>d</sup>    | 18:2 DCA              | 0.7425  | < 0.0001 <sup>b</sup> |
| Leaf color <sup>d</sup>    | Leaf Ala              | -0.599  | < 0.0001 <sup>b</sup> |
| Leaf color <sup>d</sup>    | Leaf Arg              | -0.6805 | < 0.0001 <sup>b</sup> |
| Leaf color <sup>d</sup>    | Leaf Asn              | -0.6963 | < 0.0001 <sup>b</sup> |
| Leaf color <sup>d</sup>    | Leaf Cys              | 0.5569  | < 0.0001 <sup>b</sup> |
| Leaf color <sup>d</sup>    | Leaf Glu              | 0.6372  | < 0.0001 <sup>b</sup> |
| Leaf color <sup>d</sup>    | Leaf Hyp              | 0.6842  | < 0.0001 <sup>b</sup> |
| Leaf color <sup>d</sup>    | Leaf Lys              | -0.6147 | < 0.0001 <sup>b</sup> |
| Leaf color <sup>d</sup>    | Leaf Met              | -0.5804 | < 0.0001 <sup>b</sup> |
| Leaf color <sup>d</sup>    | Leaf Phe              | -0.5061 | < 0.0001 <sup>b</sup> |
| Leaf color <sup>d</sup>    | Leaf Ser              | -0.5208 | < 0.0001 <sup>b</sup> |
| Leaf color <sup>d</sup>    | Leaf Thr              | 0.6857  | < 0.0001 <sup>b</sup> |
| Leaf color <sup>d</sup>    | Leaf Tyr              | -0.6153 | < 0.0001 <sup>b</sup> |
| Leaf color <sup>d</sup>    | Leaf Val              | -0.7228 | < 0.0001 <sup>b</sup> |
| Leaf color <sup>d</sup>    | Seed %C               | -0.5833 | < 0.0001 <sup>b</sup> |
| Leaf color <sup>d</sup>    | Seed Ala              | -0.6511 | < 0.0001 <sup>b</sup> |
| Leaf color <sup>d</sup>    | Seed Asn              | 0.6650  | < 0.0001 <sup>b</sup> |
| Leaf color <sup>d</sup>    | Seed C/N ratio        | -0.6547 | < 0.0001 <sup>b</sup> |
| Leaf color <sup>d</sup>    | Seed His              | 0.6861  | < 0.0001 <sup>b</sup> |
| Leaf color <sup>d</sup>    | Seed HoSer            | 0.524   | < 0.0001 <sup>b</sup> |
| Leaf color <sup>d</sup>    | Seed Ile              | -0.6066 | < 0.0001 <sup>b</sup> |
| Leaf color <sup>d</sup>    | Seed Met              | -0.5059 | < 0.0001 <sup>b</sup> |
| Leaf color <sup>d</sup>    | Seed Phe              | -0.5232 | < 0.0001 <sup>b</sup> |
| Leaf color <sup>d</sup>    | Seed Pro              | 0.6304  | < 0.0001 <sup>b</sup> |
| Leaf color <sup>d</sup>    | Seed Ser              | -0.5672 | < 0.0001 <sup>b</sup> |
| Leaf color <sup>d</sup>    | Seed Trp              | -0.7782 | < 0.0001 <sup>b</sup> |
| Leaf color <sup>d</sup>    | Seed Tyr              | -0.7872 | < 0.0001 <sup>b</sup> |
| Leaf Gln                   | Leaf Asn              | 0.5708  | < 0.0001              |
| Leaf Glu                   | Leaf Ala              | -0.7065 | < 0.0001              |
| Leaf Glu                   | Leaf Arg              | -0.7331 | < 0.0001              |



|                          |                         |         |                       |
|--------------------------|-------------------------|---------|-----------------------|
| Leaf Glu                 | Leaf Asp                | 0.6267  | < 0.0001              |
| Leaf HoSer               | Leaf Ala                | -0.5101 | < 0.0001              |
| Leaf HoSer               | Leaf Ser                | -0.5055 | < 0.0001              |
| Leaf Hyp                 | Leaf Ala                | -0.7964 | < 0.0001              |
| Leaf Hyp                 | Leaf Arg                | -0.7665 | < 0.0001              |
| Leaf Hyp                 | Leaf Asp                | 0.5173  | < 0.0001              |
| Leaf Hyp                 | Leaf Glu                | 0.5981  | < 0.0001              |
| Leaf Hyp                 | Leaf Lys                | -0.6586 | < 0.0001              |
| Leaf Hyp                 | Leaf Met                | -0.5414 | < 0.0001 <sup>b</sup> |
| Leaf Hyp                 | Leaf Phe                | -0.5749 | < 0.0001              |
| Leaf Hyp                 | Leaf Thr                | 0.5474  | < 0.0001 <sup>b</sup> |
| Leaf Hyp                 | Leaf Trp                | 0.5515  | < 0.0001              |
| Leaf Hyp                 | Leaf Tyr                | -0.5493 | < 0.0001 <sup>b</sup> |
| Leaf Hyp                 | Leaf Val                | -0.7785 | < 0.0001              |
| Leaf Leu                 | Leaf Ala                | 0.5306  | < 0.0001              |
| Leaf Leu                 | Leaf Asp                | -0.5975 | < 0.0001              |
| Leaf Leu                 | Leaf Glu                | -0.7171 | < 0.0001              |
| Leaf Lys                 | Leaf Ala                | 0.5409  | < 0.0001              |
| Leaf Lys                 | Leaf Arg                | 0.8230  | < 0.0001              |
| Leaf Lys                 | Leaf Asp                | -0.5143 | < 0.0001              |
| Leaf Lys                 | Leaf Glu                | -0.6399 | < 0.0001              |
| Leaf Lys                 | Leaf Leu                | 0.6325  | < 0.0001              |
| Leaf Met                 | Leaf Arg                | 0.5584  | < 0.0001 <sup>b</sup> |
| Leaf Met                 | Leaf Asn                | 0.5610  | < 0.0001              |
| Leaf Met                 | Leaf Ile                | -0.6190 | < 0.0001              |
| Leaf Met                 | Leaf Lys                | 0.6223  | < 0.0001 <sup>b</sup> |
| Leaf number <sup>d</sup> | Leaf shape <sup>d</sup> | -0.7033 | < 0.0001              |
| Leaf Phe                 | Leaf Ala                | 0.6032  | < 0.0001              |
| Leaf Phe                 | Leaf Arg                | 0.6070  | < 0.0001              |
| Leaf Phe                 | Leaf Asp                | -0.6948 | < 0.0001              |
| Leaf Phe                 | Leaf Glu                | -0.6773 | < 0.0001              |
| Leaf Phe                 | Leaf Leu                | 0.7113  | < 0.0001              |
| Leaf Phe                 | Leaf Lys                | 0.6616  | < 0.0001              |
| Leaf Phe                 | Leaf Met                | 0.5033  | < 0.0001 <sup>b</sup> |
| Leaf Pro                 | Leaf Asn                | 0.5949  | < 0.0001              |
| Leaf Pro                 | Leaf Gln                | 0.5995  | < 0.0001              |
| Leaf Pro                 | Leaf Met                | 0.7058  | < 0.0001              |
| Leaf Ser                 | Leaf Glu                | -0.6887 | < 0.0001              |
| Leaf Ser                 | Leaf Leu                | 0.5386  | < 0.0001              |
| Leaf Thr                 | Leaf Cys                | 0.6631  | < 0.0001              |
| Leaf Thr                 | Leaf Met                | -0.6047 | < 0.0001              |
| Leaf Trp                 | Leaf Ala                | -0.6170 | < 0.0001              |
| Leaf Trp                 | Leaf Arg                | -0.5105 | < 0.0001              |
| Leaf Trp                 | Leaf Thr                | 0.5041  | < 0.0001              |
| Leaf Tyr                 | Leaf Arg                | 0.5776  | < 0.0001 <sup>b</sup> |
| Leaf Tyr                 | Leaf Asn                | 0.5133  | < 0.0001 <sup>b</sup> |
| Leaf Tyr                 | Leaf Asp                | -0.5717 | < 0.0001              |
| Leaf Tyr                 | Leaf Glu                | -0.6708 | < 0.0001              |
| Leaf Tyr                 | Leaf Leu                | 0.7063  | < 0.0001              |
| Leaf Tyr                 | Leaf Lys                | 0.6330  | < 0.0001              |

|                                         |                                         |         |                       |
|-----------------------------------------|-----------------------------------------|---------|-----------------------|
| Leaf Tyr                                | Leaf Phe                                | 0.6426  | < 0.0001              |
| Leaf Val                                | Leaf Ala                                | 0.7670  | < 0.0001              |
| Leaf Val                                | Leaf Arg                                | 0.7336  | < 0.0001              |
| Leaf Val                                | Leaf Asp                                | -0.6936 | < 0.0001              |
| Leaf Val                                | Leaf Glu                                | -0.8347 | < 0.0001              |
| Leaf Val                                | Leaf Leu                                | 0.7382  | < 0.0001              |
| Leaf Val                                | Leaf Lys                                | 0.6580  | < 0.0001              |
| Leaf Val                                | Leaf Phe                                | 0.7749  | < 0.0001              |
| Leaf Val                                | Leaf Ser                                | 0.6346  | < 0.0001              |
| Leaf Val                                | Leaf Thr                                | -0.5080 | < 0.0001 <sup>b</sup> |
| Leaf Val                                | Leaf Tyr                                | 0.7334  | < 0.0001              |
| Mature leaf size <sup>d</sup>           | 14:0                                    | 0.5109  | < 0.0001 <sup>b</sup> |
| Mature leaf size <sup>d</sup>           | 16:2                                    | -0.7075 | < 0.0001 <sup>b</sup> |
| Mature leaf size <sup>d</sup>           | 16:3                                    | 0.6406  | < 0.0001 <sup>b</sup> |
| Mature leaf size <sup>d</sup>           | 16:0/(18:1d9+18:1d11)                   | 0.6855  | < 0.0001 <sup>b</sup> |
| Mature leaf size <sup>d</sup>           | 18:1d9                                  | -0.6655 | < 0.0001 <sup>b</sup> |
| Mature leaf size <sup>d</sup>           | 18:2 DCA                                | -0.7826 | < 0.0001 <sup>b</sup> |
| Mature leaf size <sup>d</sup>           | Inflorescence <sup>d</sup>              | 0.9168  | < 0.0001 <sup>b</sup> |
| Mature leaf size <sup>d</sup>           | Leaf Ala                                | 0.6141  | < 0.0001 <sup>b</sup> |
| Mature leaf size <sup>d</sup>           | Leaf Arg                                | 0.7240  | < 0.0001 <sup>b</sup> |
| Mature leaf size <sup>d</sup>           | Leaf Asn                                | 0.6275  | < 0.0001 <sup>b</sup> |
| Mature leaf size <sup>d</sup>           | Leaf Asp                                | -0.5467 | < 0.0001 <sup>b</sup> |
| Mature leaf size <sup>d</sup>           | Leaf color <sup>d</sup>                 | -0.8771 | < 0.0001 <sup>b</sup> |
| Mature leaf size <sup>d</sup>           | Leaf Cys                                | -0.5068 | < 0.0001 <sup>b</sup> |
| Mature leaf size <sup>d</sup>           | Leaf Glu                                | -0.5549 | < 0.0001 <sup>b</sup> |
| Mature leaf size <sup>d</sup>           | Leaf Hyp                                | -0.7301 | < 0.0001 <sup>b</sup> |
| Mature leaf size <sup>d</sup>           | Leaf Lys                                | 0.6820  | < 0.0001 <sup>b</sup> |
| Mature leaf size <sup>d</sup>           | Leaf Met                                | 0.6293  | < 0.0001 <sup>b</sup> |
| Mature leaf size <sup>d</sup>           | Leaf Phe                                | 0.5622  | < 0.0001 <sup>b</sup> |
| Mature leaf size <sup>d</sup>           | Leaf Thr                                | -0.5956 | < 0.0001 <sup>b</sup> |
| Mature leaf size <sup>d</sup>           | Leaf Tyr                                | 0.6762  | < 0.0001 <sup>b</sup> |
| Mature leaf size <sup>d</sup>           | Leaf Val                                | 0.7191  | < 0.0001 <sup>b</sup> |
| Mature leaf size <sup>d</sup>           | Seed %C                                 | 0.5756  | < 0.0001 <sup>b</sup> |
| Mature leaf size <sup>d</sup>           | Seed Ala                                | 0.5751  | < 0.0001 <sup>b</sup> |
| Mature leaf size <sup>d</sup>           | Seed Asn                                | -0.6179 | < 0.0001 <sup>b</sup> |
| Mature leaf size <sup>d</sup>           | Seed C/N ratio                          | 0.5862  | < 0.0001 <sup>b</sup> |
| Mature leaf size <sup>d</sup>           | Seed His                                | -0.6229 | < 0.0001 <sup>b</sup> |
| Mature leaf size <sup>d</sup>           | Seed Ile                                | 0.5307  | < 0.0001 <sup>b</sup> |
| Mature leaf size <sup>d</sup>           | Seed Phe                                | 0.5063  | < 0.0001 <sup>b</sup> |
| Mature leaf size <sup>d</sup>           | Seed Pro                                | -0.5884 | < 0.0001 <sup>b</sup> |
| Mature leaf size <sup>d</sup>           | Seed Ser                                | 0.5416  | < 0.0001 <sup>b</sup> |
| Mature leaf size <sup>d</sup>           | Seed Trp                                | 0.7402  | < 0.0001 <sup>b</sup> |
| Mature leaf size <sup>d</sup>           | Seed Tyr                                | 0.7542  | < 0.0001 <sup>b</sup> |
| Petiole chloroplast number <sup>d</sup> | Leaf number <sup>d</sup>                | 0.7033  | < 0.0001              |
| Petiole chloroplast number <sup>d</sup> | Leaf shape <sup>d</sup>                 | -1      | 0                     |
| Petiole chloroplast size <sup>d</sup>   | Leaf number <sup>d</sup>                | -0.7033 | < 0.0001              |
| Petiole chloroplast size <sup>d</sup>   | Leaf shape <sup>d</sup>                 | 1       | 0                     |
| Petiole chloroplast size <sup>d</sup>   | Petiole chloroplast number <sup>d</sup> | -1      | 0                     |
| Seed %C                                 | Seed Ala                                | 0.5497  | < 0.0001 <sup>b</sup> |
| Seed %C                                 | Seed His                                | -0.5270 | < 0.0001 <sup>b</sup> |

|                |                       |         |                       |
|----------------|-----------------------|---------|-----------------------|
| Seed %C        | Seed Met              | 0.5128  | < 0.0001              |
| Seed %C        | Seed Pro              | -0.5762 | < 0.0001 <sup>b</sup> |
| Seed %C        | Seed Trp              | 0.5697  | < 0.0001 <sup>b</sup> |
| Seed Ala       | 16:0/(18:1d9+18:1d11) | 0.5265  | < 0.0001 <sup>b</sup> |
| Seed Ala       | 18:1d9                | -0.5086 | < 0.0001 <sup>b</sup> |
| Seed Ala       | Leaf Lys              | 0.5004  | < 0.0001 <sup>b</sup> |
| Seed Asn       | 16:2                  | 0.5810  | < 0.0001 <sup>b</sup> |
| Seed Asn       | 16:0/(18:1d9+18:1)    | -0.5582 | < 0.0001 <sup>b</sup> |
| Seed Asn       | 18:2 DCA              | 0.5995  | < 0.0001 <sup>b</sup> |
| Seed Asn       | Leaf Asn              | -0.5117 | < 0.0001 <sup>b</sup> |
| Seed Asn       | Leaf Tyr              | -0.5095 | < 0.0001 <sup>b</sup> |
| Seed Asn       | Leaf Val              | -0.5411 | < 0.0001 <sup>b</sup> |
| Seed C/N ratio | Leaf Asn              | 0.5203  | < 0.0001 <sup>b</sup> |
| Seed C/N ratio | Seed %C               | 0.5280  | < 0.0001 <sup>b</sup> |
| Seed C/N ratio | Seed %N               | -0.6897 | < 0.0001              |
| Seed C/N ratio | Seed Ala              | 0.5453  | < 0.0001              |
| Seed C/N ratio | Seed His              | -0.5852 | < 0.0001              |
| Seed C/N ratio | Seed Met              | 0.5958  | < 0.0001              |
| Seed C/N ratio | Seed Pro              | -0.5735 | < 0.0001 <sup>b</sup> |
| Seed C/N ratio | Seed Trp              | 0.6904  | < 0.0001              |
| Seed C/N ratio | Seed Tyr              | 0.6257  | < 0.0001 <sup>b</sup> |
| Seed GABA      | Seed Arg              | -0.5246 | < 0.0001              |
| Seed GABA      | Seed Asp              | -0.6090 | < 0.0001              |
| Seed GABA      | Seed Gln              | 0.5101  | < 0.0001              |
| Seed GABA      | Seed Glu              | -0.7483 | < 0.0001              |
| Seed GABA      | Seed Met              | -0.6808 | < 0.0001              |
| Seed GABA      | Seed Pro              | 0.6376  | < 0.0001              |
| Seed GABA      | Seed Thr              | 0.6462  | < 0.0001              |
| Seed Glu       | Seed Ala              | 0.5141  | < 0.0001              |
| Seed Glu       | Seed Asp              | 0.7679  | < 0.0001              |
| Seed Glu       | Seed Gln              | -0.5389 | < 0.0001              |
| Seed His       | 16:2                  | 0.5762  | < 0.0001 <sup>b</sup> |
| Seed His       | Leaf Arg              | -0.5689 | < 0.0001 <sup>b</sup> |
| Seed His       | Leaf Glu              | 0.5757  | < 0.0001 <sup>b</sup> |
| Seed His       | Leaf Lys              | -0.5432 | < 0.0001 <sup>b</sup> |
| Seed His       | Leaf Phe              | -0.5371 | < 0.0001              |
| Seed His       | Leaf Tyr              | -0.6094 | < 0.0001              |
| Seed His       | Leaf Val              | -0.5635 | < 0.0001 <sup>b</sup> |
| Seed His       | Seed Ala              | -0.5526 | < 0.0001 <sup>b</sup> |
| Seed His       | Seed Glu              | -0.5819 | < 0.0001              |
| Seed HoSer     | Seed Ala              | -0.5558 | < 0.0001              |
| Seed HoSer     | Seed Met              | -0.5226 | < 0.0001              |
| Seed HoSer     | Seed Pro              | 0.6357  | < 0.0001              |
| Seed HoSer     | Seed Trp              | -0.5572 | < 0.0001              |
| Seed HoSer     | Seed Tyr              | -0.5222 | < 0.0001              |
| Seed Hyp       | Seed Glu              | -0.5541 | < 0.0001              |
| Seed Hyp       | Seed Leu              | 0.5178  | < 0.0001              |
| Seed Ile       | 16:2                  | -0.5275 | < 0.0001 <sup>b</sup> |
| Seed Ile       | 16:0/(18:1d9+18:1d11) | 0.5670  | < 0.0001 <sup>b</sup> |
| Seed Ile       | 18:1d9                | -0.5407 | < 0.0001 <sup>b</sup> |

|          |                       |         |                       |
|----------|-----------------------|---------|-----------------------|
| Seed Ile | 18:2 DCA              | -0.5691 | < 0.0001              |
| Seed Ile | Leaf Thr              | -0.5150 | < 0.0001 <sup>b</sup> |
| Seed Ile | Seed Asn              | -0.6500 | < 0.0001              |
| Seed Leu | Seed Asp              | -0.5341 | < 0.0001              |
| Seed Leu | Seed Gln              | 0.5238  | < 0.0001              |
| Seed Leu | Seed Ile              | 0.6803  | < 0.0001              |
| Seed Lys | Seed Leu              | 0.5308  | < 0.0001              |
| Seed Met | Seed Ala              | 0.5517  | < 0.0001              |
| Seed Met | Seed Asp              | 0.5774  | < 0.0001              |
| Seed Met | Seed Glu              | 0.7266  | < 0.0001              |
| Seed Met | Seed His              | -0.6132 | < 0.0001              |
| Seed Phe | 18:2 DCA              | -0.5257 | < 0.0001              |
| Seed Phe | Leaf Asn              | 0.5139  | < 0.0001              |
| Seed Phe | Seed Ile              | 0.5613  | < 0.0001              |
| Seed Phe | Seed Leu              | 0.6058  | < 0.0001              |
| Seed Pro | Seed Ala              | -0.7311 | < 0.0001              |
| Seed Pro | Seed Asp              | -0.6532 | < 0.0001              |
| Seed Pro | Seed Glu              | -0.8038 | < 0.0001              |
| Seed Pro | Seed His              | 0.6752  | < 0.0001              |
| Seed Pro | Seed Met              | -0.7879 | < 0.0001              |
| Seed Ser | Leaf Thr              | -0.5366 | < 0.0001 <sup>b</sup> |
| Seed Ser | Seed Ala              | 0.5739  | < 0.0001              |
| Seed Ser | Seed Pro              | -0.5933 | < 0.0001              |
| Seed Thr | Seed Arg              | -0.5362 | < 0.0001              |
| Seed Thr | Seed Glu              | -0.6119 | < 0.0001              |
| Seed Thr | Seed Met              | -0.5298 | < 0.0001              |
| Seed Thr | Seed Pro              | 0.5989  | < 0.0001              |
| Seed Trp | 16:2                  | -0.6334 | < 0.0001 <sup>b</sup> |
| Seed Trp | 16:3                  | 0.5702  | < 0.0001 <sup>b</sup> |
| Seed Trp | 16:0/(18:1d9+18:1d11) | 0.6404  | < 0.0001 <sup>b</sup> |
| Seed Trp | 18:1d9                | -0.6255 | < 0.0001 <sup>b</sup> |
| Seed Trp | 18:2 DCA              | -0.584  | < 0.0001 <sup>b</sup> |
| Seed Trp | Leaf Arg              | 0.5712  | < 0.0001 <sup>b</sup> |
| Seed Trp | Leaf Asn              | 0.6569  | < 0.0001 <sup>b</sup> |
| Seed Trp | Leaf Cys              | -0.5059 | < 0.0001 <sup>b</sup> |
| Seed Trp | Leaf Hyp              | -0.5073 | < 0.0001 <sup>b</sup> |
| Seed Trp | Leaf Lys              | 0.5556  | < 0.0001 <sup>b</sup> |
| Seed Trp | Leaf Met              | 0.5639  | < 0.0001 <sup>b</sup> |
| Seed Trp | Leaf Thr              | -0.5726 | < 0.0001 <sup>b</sup> |
| Seed Trp | Leaf Val              | 0.5242  | < 0.0001 <sup>b</sup> |
| Seed Trp | Seed Ala              | 0.6263  | < 0.0001              |
| Seed Trp | Seed Asn              | -0.5165 | < 0.0001 <sup>b</sup> |
| Seed Trp | Seed His              | -0.6392 | < 0.0001 <sup>b</sup> |
| Seed Trp | Seed Met              | 0.6530  | < 0.0001              |
| Seed Trp | Seed Pro              | -0.6546 | < 0.0001              |
| Seed Trp | Seed Ser              | 0.5282  | < 0.0001 <sup>b</sup> |
| Seed Tyr | 16:2                  | -0.6379 | < 0.0001 <sup>b</sup> |
| Seed Tyr | 16:3                  | 0.5853  | < 0.0001 <sup>b</sup> |
| Seed Tyr | 16:0/(18:1d9+18:1d11) | 0.6304  | < 0.0001 <sup>b</sup> |
| Seed Tyr | 18:1d9                | -0.5960 | < 0.0001 <sup>b</sup> |

|          |          |         |                       |
|----------|----------|---------|-----------------------|
| Seed Tyr | 18:2 DCA | -0.6334 | < 0.0001 <sup>b</sup> |
| Seed Tyr | Leaf Arg | 0.5422  | < 0.0001 <sup>b</sup> |
| Seed Tyr | Leaf Asn | 0.6325  | < 0.0001 <sup>b</sup> |
| Seed Tyr | Leaf Cys | -0.5319 | < 0.0001 <sup>b</sup> |
| Seed Tyr | Leaf Thr | -0.5472 | < 0.0001 <sup>b</sup> |
| Seed Tyr | Leaf Val | 0.5340  | < 0.0001 <sup>b</sup> |
| Seed Tyr | Seed Ala | 0.6942  | < 0.0001              |
| Seed Tyr | Seed His | -0.5885 | < 0.0001 <sup>b</sup> |
| Seed Tyr | Seed Met | 0.7000  | < 0.0001              |
| Seed Tyr | Seed Phe | 0.5188  | < 0.0001 <sup>b</sup> |
| Seed Tyr | Seed Pro | -0.6914 | < 0.0001              |
| Seed Tyr | Seed Ser | 0.6520  | < 0.0001              |
| Seed Tyr | Seed Trp | 0.7791  | < 0.0001              |
| Seed Val | Seed Asp | -0.5897 | < 0.0001              |
| Seed Val | Seed Glu | -0.5101 | < 0.0001              |
| Seed Val | Seed Ile | 0.7679  | < 0.0001              |
| Seed Val | Seed Leu | 0.6929  | < 0.0001              |

<sup>a</sup>Spearman's  $\rho$  correlations were calculated from the table containing z-scores of mol% of amino acids and fatty acids, z-scores of, %C and %N, z-scores of fatty acid and C/N ratios, and from numeric codes of morphological and qualitative traits. Only data from Col and Ws wild-type plants were used.

<sup>b</sup>Correlations that were not significant ( $p > 0.05$ ) when only data from Col wild-type plants were used. Presumably, many of these correlations are due to differences in ecotypes.

<sup>c</sup>Correlations caused by mathematical reasons are indicated.

<sup>d</sup>Non-quantitative variables are indicated.

**Supplementary Table 7.** Spearman's correlation of traits in Col wild-type plants with  $|\rho| > 0.5^a$

| Variable                                 | by Variable                              | $\rho$  | Prob $>  \rho $        |
|------------------------------------------|------------------------------------------|---------|------------------------|
| 16:3                                     | 16:0                                     | -0.6408 | <.0001 <sup>b</sup>    |
| 18:0                                     | 16:0                                     | 0.5351  | <.0001                 |
| 18:0                                     | 16:3                                     | -0.5667 | <.0001 <sup>b</sup>    |
| 18:2                                     | 16:3                                     | -0.8020 | <.0001 <sup>b</sup>    |
| 18:2                                     | 18:0                                     | 0.5766  | <.0001                 |
| 18:2                                     | 18:1d9                                   | 0.5995  | <.0001                 |
| 18:3                                     | 16:0                                     | -0.5028 | <.0001 <sup>b</sup>    |
| 18:3                                     | 18:0                                     | -0.6496 | <.0001 <sup>b</sup>    |
| 18:3                                     | 18:2                                     | -0.5401 | <.0001 <sup>b</sup>    |
| 18:3                                     | 18:1d9                                   | -0.6578 | <.0001 <sup>b</sup>    |
| (16:3+ <i>trans</i> -16:1d3)/(18:0+18:2) | 16:0                                     | -0.6186 | <.0001                 |
| (16:3+ <i>trans</i> -16:1d3)/(18:0+18:2) | 16:3                                     | 0.8996  | <.0001 <sup>bc</sup>   |
| (16:3+ <i>trans</i> -16:1d3)/(18:0+18:2) | 18:0                                     | -0.6516 | <.0001 <sup>c</sup>    |
| (16:3+ <i>trans</i> -16:1d3)/(18:0+18:2) | 18:2                                     | -0.8515 | <.0001 <sup>c</sup>    |
| (16:3+ <i>trans</i> -16:1d3)/(18:0+18:2) | 18:1d9                                   | -0.6878 | <.0001                 |
| 16:0/(18:1d9+18:1d11)                    | 18:1d9                                   | -0.7131 | <.0001 <sup>c</sup>    |
| 16:3/18:2                                | 16:0                                     | -0.5967 | <.0001                 |
| 16:3/18:2                                | 16:3                                     | 0.9431  | <.0001 <sup>bc</sup>   |
| 16:3/18:2                                | 18:0                                     | -0.5921 | <.0001                 |
| 16:3/18:2                                | 18:2                                     | -0.8734 | <.0001 <sup>c</sup>    |
| 16:3/18:2                                | (16:3+ <i>trans</i> -16:1d3)/(18:0+18:2) | 0.9410  | <.0001 <sup>c</sup>    |
| 16:3/18:2                                | 18:1d9                                   | -0.6558 | < 0.0001               |
| 18:1d11                                  | 16:2                                     | -0.7067 | < 0.0001               |
| 18:1d9                                   | 16:0                                     | 0.6114  | < 0.0001               |
| 18:1d9                                   | 16:3                                     | -0.6912 | < 0.0001 <sup>b</sup>  |
| 18:1d9                                   | 18:0                                     | 0.6465  | < 0.0001               |
| Leaf Arg                                 | Leaf Ala                                 | 0.6169  | < 0.0001               |
| Leaf Asp                                 | Leaf Ala                                 | -0.6707 | < 0.0001               |
| Leaf GABA                                | Leaf Arg                                 | 0.5664  | < 0.0001               |
| Leaf Gln                                 | Leaf Asn                                 | 0.5260  | < 0.0001               |
| Leaf Glu                                 | Leaf Ala                                 | -0.6522 | < 0.0001 <sup>b</sup>  |
| Leaf Glu                                 | Leaf Arg                                 | -0.5698 | < 0.0001               |
| Leaf Glu                                 | Leaf Asp                                 | 0.6154  | < 0.0001 <sup>d</sup>  |
| Leaf His                                 | Leaf Arg                                 | 0.5727  | < 0.0001 <sup>b</sup>  |
| Leaf His                                 | Leaf Asp                                 | -0.5274 | < 0.0001 <sup>b</sup>  |
| Leaf His                                 | Leaf Glu                                 | -0.6075 | < 0.0001 <sup>b</sup>  |
| Leaf HoSer                               | Leaf Glu                                 | 0.5138  | < 0.0001               |
| Leaf HoSer                               | Leaf Pro                                 | 0.5180  | < 0.0001               |
| Leaf HoSer                               | Leaf Ser                                 | -0.5238 | < 0.0001 <sup>b</sup>  |
| Leaf Hyp                                 | Leaf Ala                                 | -0.6447 | < 0.0001 <sup>b</sup>  |
| Leaf Hyp                                 | Leaf Arg                                 | -0.5439 | < 0.0001 <sup>d</sup>  |
| Leaf Hyp                                 | Leaf Val                                 | -0.5768 | < 0.0001 <sup>b</sup>  |
| Leaf Leu                                 | Leaf Asp                                 | -0.6032 | < 0.0001 <sup>bd</sup> |
| Leaf Leu                                 | Leaf Glu                                 | -0.7041 | < 0.0001 <sup>b</sup>  |
| Leaf Leu                                 | Leaf His                                 | 0.5398  | < 0.0001               |
| Leaf Lys                                 | Leaf Arg                                 | 0.6733  | < 0.0001 <sup>b</sup>  |
| Leaf Lys                                 | Leaf His                                 | 0.6326  | < 0.0001               |

|                                         |                                         |         |                       |
|-----------------------------------------|-----------------------------------------|---------|-----------------------|
| Leaf number <sup>e</sup>                | Leaf color <sup>e</sup>                 | -1      | 0 <sup>d</sup>        |
| Leaf number <sup>e</sup>                | Leaf shape <sup>e</sup>                 | -1      | 0                     |
| Leaf Phe                                | Leaf Ala                                | 0.5062  | < 0.0001              |
| Leaf Phe                                | Leaf Asp                                | -0.6948 | < 0.0001 <sup>b</sup> |
| Leaf Phe                                | Leaf Glu                                | -0.6316 | < 0.0001 <sup>b</sup> |
| Leaf Phe                                | Leaf Leu                                | 0.6762  | < 0.0001              |
| Leaf Pro                                | Leaf Asn                                | 0.5201  | < 0.0001              |
| Leaf Pro                                | Leaf Gln                                | 0.5508  | < 0.0001              |
| Leaf Pro                                | Leaf Met                                | 0.7480  | < 0.0001              |
| Leaf Ser                                | Leaf Glu                                | -0.5993 | < 0.0001 <sup>b</sup> |
| Leaf Ser                                | Leaf Leu                                | 0.5431  | < 0.0001 <sup>d</sup> |
| Leaf Ser                                | Leaf Met                                | -0.6501 | < 0.0001 <sup>b</sup> |
| Leaf Ser                                | Leaf Pro                                | -0.6063 | < 0.0001 <sup>b</sup> |
| Leaf shape <sup>e</sup>                 | Leaf color <sup>e</sup>                 | 1       | 0 <sup>d</sup>        |
| Leaf Tyr                                | Leaf His                                | 0.5107  | < 0.0001              |
| Leaf Tyr                                | Leaf Leu                                | 0.5735  | < 0.0001              |
| Leaf Val                                | Leaf Ala                                | 0.6425  | < 0.0001              |
| Leaf Val                                | Leaf Asp                                | -0.6233 | < 0.0001 <sup>b</sup> |
| Leaf Val                                | Leaf Glu                                | -0.7683 | < 0.0001 <sup>b</sup> |
| Leaf Val                                | Leaf His                                | 0.5226  | < 0.0001              |
| Leaf Val                                | Leaf Leu                                | 0.6979  | < 0.0001              |
| Leaf Val                                | Leaf Phe                                | 0.7422  | < 0.0001              |
| Leaf Val                                | Leaf Ser                                | 0.5365  | < 0.0001              |
| Petiole chloroplast number <sup>e</sup> | Leaf color <sup>e</sup>                 | -1      | 0 <sup>d</sup>        |
| Petiole chloroplast number <sup>e</sup> | Leaf number <sup>e</sup>                | 1       | 0                     |
| Petiole chloroplast number <sup>e</sup> | Leaf shape <sup>e</sup>                 | -1      | 0                     |
| Petiole chloroplast size <sup>e</sup>   | Leaf color <sup>e</sup>                 | 1       | 0 <sup>d</sup>        |
| Petiole chloroplast size <sup>e</sup>   | Leaf number <sup>e</sup>                | -1      | 0 <sup>d</sup>        |
| Petiole chloroplast size <sup>e</sup>   | Leaf shape <sup>e</sup>                 | 1       | 0 <sup>d</sup>        |
| Petiole chloroplast size <sup>e</sup>   | Petiole chloroplast number <sup>e</sup> | -1      | 0                     |
| Seed Asn                                | Seed Arg                                | 0.5771  | < 0.0001              |
| Seed Asp                                | Seed Asn                                | 0.5442  | < 0.0001 <sup>b</sup> |
| Seed C/N ratio                          | Seed %N                                 | -0.7825 | < 0.0001              |
| Seed GABA                               | Seed Asp                                | -0.5874 | < 0.0001 <sup>b</sup> |
| Seed GABA                               | Seed Gln                                | 0.5175  | < 0.0001              |
| Seed GABA                               | Seed Glu                                | -0.6332 | < 0.0001 <sup>b</sup> |
| Seed GABA                               | Seed Leu                                | 0.5793  | < 0.0001              |
| Seed GABA                               | Seed Pro                                | 0.5419  | < 0.0001              |
| Seed GABA                               | Seed Thr                                | 0.5632  | < 0.0001 <sup>d</sup> |
| Seed GABA                               | Seed Val                                | 0.5402  | < 0.0001              |
| Seed Glu                                | Seed Asn                                | 0.5632  | < 0.0001              |
| Seed Glu                                | Seed Asp                                | 0.8114  | < 0.0001              |
| Seed Glu                                | Seed Gln                                | -0.5377 | < 0.0001 <sup>b</sup> |
| Seed His                                | Seed Asp                                | -0.5483 | < 0.0001 <sup>b</sup> |
| Seed His                                | Seed Gln                                | 0.5398  | < 0.0001              |
| Seed His                                | Seed Glu                                | -0.5697 | < 0.0001 <sup>b</sup> |
| Seed HoSer                              | Seed Pro                                | 0.5031  | < 0.0001              |
| Seed Hyp                                | Seed Glu                                | -0.5663 | < 0.0001 <sup>b</sup> |
| Seed Hyp                                | Seed His                                | 0.5602  | < 0.0001              |
| Seed Hyp                                | Seed Ile                                | 0.5173  | < 0.0001              |

|          |          |         |                         |
|----------|----------|---------|-------------------------|
| Seed Ile | Seed Asp | -0.6876 | < 0.0001 <sup>b</sup>   |
| Seed Ile | Seed Glu | -0.7062 | < 0.0001 <sup>b</sup>   |
| Seed Ile | Seed His | 0.5180  | < 0.0001                |
| Seed Leu | Seed Asp | -0.5753 | < 0.0001 <sup>b</sup>   |
| Seed Leu | Seed Glu | -0.5861 | < 0.0001                |
| Seed Leu | Seed Ile | 0.7248  | < 0.0001                |
| Seed Lys | Seed Leu | 0.5237  | < 0.0001                |
| Seed Met | Seed Asp | 0.6370  | < 0.0001                |
| Seed Met | Seed Glu | 0.6861  | < 0.0001                |
| Seed Phe | Seed Gln | 0.5239  | < 0.0001                |
| Seed Phe | Seed Leu | 0.7467  | < 0.0001                |
| Seed Pro | Seed Ala | -0.5523 | < 0.0001 <sup>b</sup>   |
| Seed Pro | Seed Asn | -0.6319 | < 0.0001                |
| Seed Pro | Seed Asp | -0.8521 | < 0.0001 <sup>b</sup>   |
| Seed Pro | Seed Glu | -0.8899 | < 0.0001 <sup>b</sup>   |
| Seed Pro | Seed Ile | 0.6247  | < 0.0001                |
| Seed Pro | Seed Met | -0.7049 | < 0.0001 <sup>b</sup>   |
| Seed Ser | Seed Pro | -0.5195 | < 0.0001 <sup>b</sup>   |
| Seed Thr | Seed Leu | 0.5172  | < 0.0001                |
| Seed Tyr | Seed Lys | 0.5177  | < 0.0001                |
| Seed Tyr | Seed Met | 0.5043  | < 0.0001                |
| Seed Val | Seed Asp | -0.6989 | < 0.0001 <sup>b</sup>   |
| Seed Val | Seed Glu | -0.7766 | < 0.0001 <sup>b</sup>   |
| Seed Val | Seed His | 0.5760  | < 0.0001                |
| Seed Val | Seed Ile | 0.8065  | < 0.0001                |
| Seed Val | Seed Leu | 0.6910  | < 0.0001                |
| Seed Val | Seed Met | -0.5362 | < 0.0001 <sup>b,d</sup> |
| Seed Val | Seed Phe | 0.5358  | < 0.0001                |
| Seed Val | Seed Pro | 0.6617  | < 0.0001                |

<sup>a</sup>Spearman's  $\rho$  correlations were calculated from the table containing  $z$ -scores of mol% of amino acids and fatty acids,  $z$ -scores of %C and %N,  $z$ -scores of fatty acid and C/N ratios, and from numeric codes of morphological and qualitative traits. Only data from Col wild-type plants were used.

<sup>b</sup>Correlations that were either not significant ( $p > 0.05$ ) or in the opposite direction when  $z$ -scores were calculated from nmol/g FW of amino acids and fatty acids.

<sup>c</sup>Correlations caused by mathematical reasons are indicated.

<sup>d</sup>During our pipeline, we screened hundreds of homozygous T-DNA insertion lines of chloroplast-targeted genes for the same traits. Spearman's  $\rho$  correlations were calculated. "d" indicates correlations that were either not significant ( $p > 0.05$ ) or in the opposite direction in the pipeline data.

<sup>e</sup>Non-quantitative variables are indicated.



**Supplementary Table 8.** *k*-means clustering analysis of mutants and wild-type plants in this study

| Cluster <sup>a</sup> | Genotype       | Number of samples |
|----------------------|----------------|-------------------|
| 1 <sup>b</sup>       | <i>pig1-1</i>  | 3                 |
| 2 <sup>b</sup>       | Col WT         | 58                |
|                      | <i>npq1-2</i>  | 5                 |
| 3 <sup>b</sup>       | <i>tha1-1</i>  | 3                 |
| 4 <sup>b</sup>       | <i>tt7-3</i>   | 6                 |
| 5 <sup>b</sup>       | <i>fatb-ko</i> | 5                 |
| 6                    | Col WT         | 3                 |
|                      | <i>npq1-2</i>  | 1                 |
|                      | <i>pig1-1</i>  | 1                 |
| 7 <sup>b</sup>       | <i>ats1-1</i>  | 4                 |
| 8                    | <i>dpe2-1</i>  | 3                 |
|                      | Ws WT          | 3                 |
| 9 <sup>b</sup>       | <i>5-fcl</i>   | 3                 |
| 10 <sup>b</sup>      | Col WT         | 2                 |
|                      | Ws WT          | 1                 |
| 11                   | <i>arc12</i>   | 4                 |
|                      | <i>sex1-1</i>  | 3                 |
|                      | <i>sex4-5</i>  | 4                 |
|                      | Ws WT          | 1                 |
| 12                   | <i>arc10</i>   | 5                 |
|                      | <i>lkr-sdh</i> | 3                 |
|                      | Ws WT          | 27                |

<sup>a</sup>The number of *k*-means clustered was set to 12 according to the number of hierarchical clustered obtained.

<sup>b</sup>*k*-means clusters that existed in hierarchical clustering as well.
