# Supplementary material
Source: PubMed Central journal article supplement (PMC2287328)

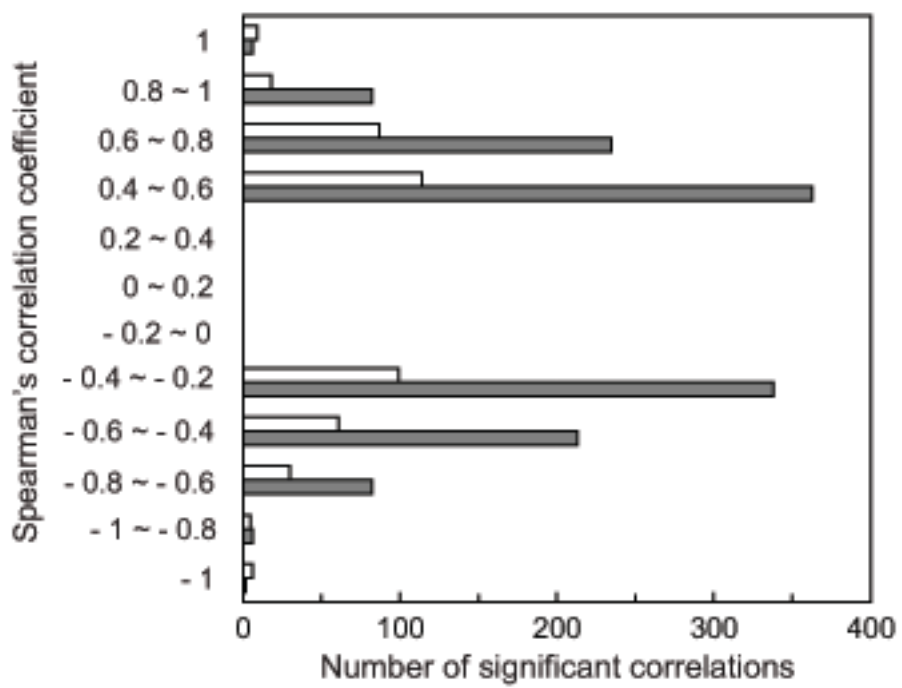

Supplement: plntphys_pp.107.115220_2.pdf [file plntphys_pp.107.115220_2.pdf]

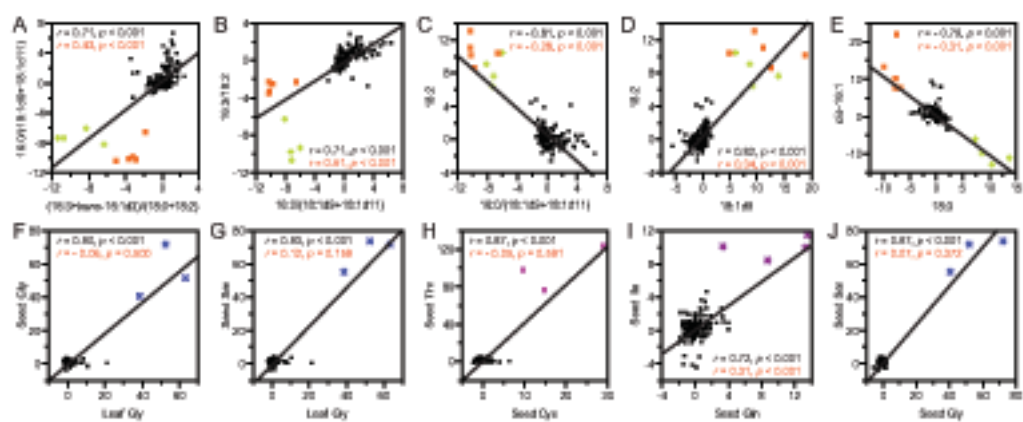

Supplement: plntphys_pp.107.115220_3.pdf [file plntphys_pp.107.115220_3.pdf]
